# Supplementary material for: Heat shock proteins as key biological targets of the marine natural cyclopeptide perthamide C
Source: Royal Society of Chemistry journal article supplement (doi:10.1039/c2mb05507d), 2012-01-27
Supplement: c2mb05507d.pdf [file c2mb05507d.pdf]

## Supporting Information

### Heat Shock Proteins as Key Biological Targets of the Marine Natural Cyclopeptide Perthamide C

Luigi Margarucci<sup>1</sup>, Maria Chiara Monti<sup>1</sup>, Andrea Mencarelli<sup>2</sup>, Chiara Cassiano<sup>1</sup>, Stefano Fiorucci<sup>2</sup>, Raffaele Riccio<sup>1</sup>, Angela Zampella<sup>3</sup>, Agostino Casapullo<sup>1\*</sup>.

*1. Dipartimento di Scienze Farmaceutiche, Università degli Studi di Salerno, Via Ponte don Melillo, 84084 Fisciano, Italy,*

*2. Dipartimento di Medicina Clinica e Sperimentale, Università degli Studi di Perugia, Via E dal Pozzo, 06122, Perugia, Italy*

*3. Dipartimento di Chimica delle Sostanze Naturali, Università degli Studi di Napoli "Federico II", via D. Montesano 49, 80131 Napoli, Italy*

\* Corresponding author. Tel.: +39 089 969243; fax: +39 089 969602; e-mail: [casapullo@unisa.it](mailto:casapullo@unisa.it)

### Tandem MS analysis of PRT C- 4,7,10-trioxa-1,13-tridecanediamine covalent adduct

To determine the reaction pathway between PRT C and  $\text{NH}_2\text{-(PEG)}_2\text{-NH}_2$  spacer, the product formed after incubation and recorded at  $m/z$  1226.54 was subjected to MSMS analysis. The MS/MS fragmentation spectra of this ion gave rise to two daughter ions at  $m/z$  of 1146.33 and 870.35, corresponding to the loss of  $\text{SO}_3$  on the entire molecule and a fragment without PEG spacer, respectively. This fragmentation is in accordance with an adduct produced by the nucleophilic attack of the spacer terminal amino group onto the  $\beta$ -sulfated Asn carbonyl residue of PRT C, followed by urea loss.

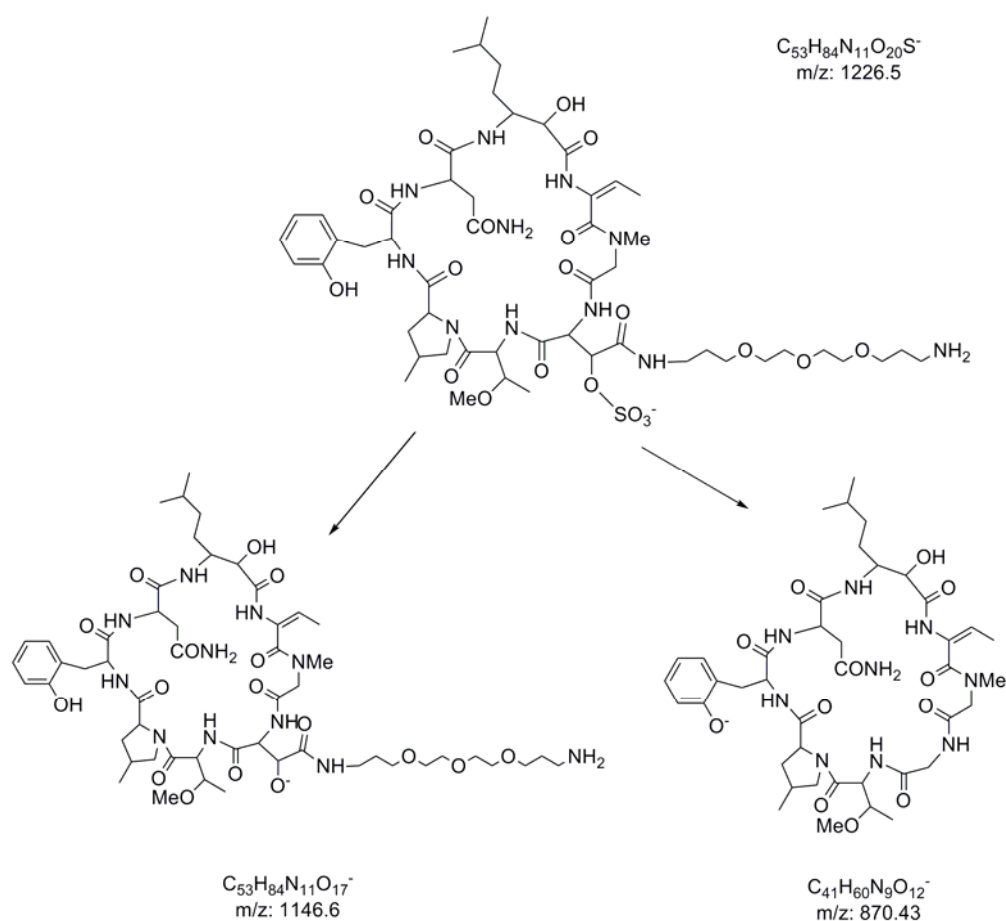

**Fig. S1:** Ion fragments obtained during tandem MS experiments on the parent ion at 1226.5

## Mascot report for Endoplasmin and peak lists

Endoplasmin (Glucose Related Protein 94, GRP94) fitting mass values of three independent experiments are reported here. In addition, all the peak lists, which were sent to Mascot, are available in the pride database under the PRIDE experiment accession number 16675-16680 and the project title name “PRT C Based Chemical Proteomics Experiment”<sup>[1]</sup>.

| Experiment 1                                                                |           |           |           |        |      |       |         |      |        |                                  |
|-----------------------------------------------------------------------------|-----------|-----------|-----------|--------|------|-------|---------|------|--------|----------------------------------|
| ENPL_MOUSE Mass: 92703 Score: 41 Matches: 3(1) Sequences: 3(1) emPAI: 0.10  |           |           |           |        |      |       |         |      |        |                                  |
| Endoplasmin OS=Mus musculus GN=Hsp90b1 PE=1 SV=2                            |           |           |           |        |      |       |         |      |        |                                  |
| Check to include this hit in error tolerant search                          |           |           |           |        |      |       |         |      |        |                                  |
| Query                                                                       | Observed  | Mr(expt)  | Mr(calc)  | ppm    | Miss | Score | Expect  | Rank | Unique | Peptide                          |
| <a href="#">13</a>                                                          | 638.3018  | 1274.5890 | 1274.6354 | -36.35 | 0    | 25    | 0.27    | 1    | U      | R.ELISNASDALDK.I                 |
| <a href="#">15</a>                                                          | 645.2770  | 1288.5394 | 1288.5935 | -41.96 | 0    | 4     | 29      | 2    | U      | K.DISTNYASQK.K                   |
| <a href="#">58</a>                                                          | 743.3461  | 1484.6776 | 1484.7471 | -46.78 | 0    | 37    | 0.017   | 1    | U      | K.GVVSDDLLPLNVS.R.E              |
| Experiment 2                                                                |           |           |           |        |      |       |         |      |        |                                  |
| ENPL_MOUSE Mass: 92703 Score: 107 Matches: 9(3) Sequences: 7(2) emPAI: 0.22 |           |           |           |        |      |       |         |      |        |                                  |
| Endoplasmin OS=Mus musculus GN=Hsp90b1 PE=1 SV=2                            |           |           |           |        |      |       |         |      |        |                                  |
| Check to include this hit in error tolerant search                          |           |           |           |        |      |       |         |      |        |                                  |
| Query                                                                       | Observed  | Mr(expt)  | Mr(calc)  | ppm    | Miss | Score | Expect  | Rank | Unique | Peptide                          |
| <a href="#">14</a>                                                          | 638.2910  | 1274.5674 | 1274.6354 | -53.29 | 0    | 38    | 0.013   | 1    |        | R.ELISNASDALDK.I                 |
| <a href="#">15</a>                                                          | 638.3164  | 1274.6182 | 1274.6354 | -13.44 | 0    | (36)  | 0.023   | 1    |        | R.ELISNASDALDK.I                 |
| <a href="#">63</a>                                                          | 765.3560  | 1528.6974 | 1528.7668 | -45.36 | 0    | 9     | 13      | 2    | U      | K.NLLHVTDGVMTR.E + Oxidation (M) |
| <a href="#">68</a>                                                          | 772.8810  | 1543.7474 | 1543.8205 | -47.35 | 1    | (18)  | 1.7     | 1    |        | R.ELISNASDALDKIR.L               |
| <a href="#">69</a>                                                          | 772.8945  | 1543.7744 | 1543.8205 | -29.86 | 1    | 19    | 1.2     | 1    |        | R.ELISNASDALDKIR.L               |
| <a href="#">129</a>                                                         | 1015.4975 | 2028.9804 | 2029.0579 | -38.16 | 0    | 13    | 5.4     | 1    | U      | R.LISLTDENALAGNEELTVK.I          |
| <a href="#">145</a>                                                         | 750.6515  | 2248.9327 | 2249.0349 | -45.45 | 0    | 64    | 4.4e-05 | 1    | U      | R.FQSSHSTDITSLDQYVER.M           |
| <a href="#">188</a>                                                         | 910.0768  | 2727.2086 | 2727.3311 | -44.93 | 1    | 3     | 61      | 2    | U      | R.TDEVVQREEEAIQLDGLNASQIR.E      |
| <a href="#">195</a>                                                         | 917.7828  | 2750.3266 | 2750.4048 | -28.44 | 2    | 31    | 0.094   | 1    | U      | R.IKEDEDDKTVMDLAVVLFETATLR.S     |
| Experiment 3                                                                |           |           |           |        |      |       |         |      |        |                                  |
| ENPL_MOUSE Mass: 92703 Score: 105 Matches: 7(3) Sequences: 6(3) emPAI: 0.16 |           |           |           |        |      |       |         |      |        |                                  |
| Endoplasmin OS=Mus musculus GN=Hsp90b1 PE=1 SV=2                            |           |           |           |        |      |       |         |      |        |                                  |
| Check to include this hit in error tolerant search                          |           |           |           |        |      |       |         |      |        |                                  |
| Query                                                                       | Observed  | Mr(expt)  | Mr(calc)  | ppm    | Miss | Score | Expect  | Rank | Unique | Peptide                          |
| <a href="#">10</a>                                                          | 638.3296  | 1274.6446 | 1274.6354 | 7.27   | 0    | 30    | 0.063   | 1    | U      | R.ELISNASDALDK.I                 |
| <a href="#">11</a>                                                          | 638.3450  | 1274.6754 | 1274.6354 | 31.4   | 0    | (19)  | 0.62    | 1    | U      | R.ELISNASDALDK.I                 |
| <a href="#">15</a>                                                          | 645.3071  | 1288.5996 | 1288.5935 | 4.75   | 0    | 22    | 0.51    | 1    | U      | K.DISTNYASQK.K                   |
| <a href="#">51</a>                                                          | 743.3839  | 1484.7532 | 1484.7471 | 4.14   | 0    | 64    | 2.4e-05 | 1    | U      | K.GVVSDDLLPLNVS.R.E              |
| <a href="#">60</a>                                                          | 763.3728  | 1524.7310 | 1524.7195 | 7.58   | 0    | 47    | 0.0017  | 1    | U      | K.EEASDYLELDTIK.N                |
| <a href="#">100</a>                                                         | 750.6837  | 2249.0293 | 2249.0349 | -2.50  | 0    | 12    | 4.4     | 1    | U      | R.FQSSHSTDITSLDQYVER.M           |
| <a href="#">116</a>                                                         | 910.1188  | 2727.3346 | 2727.3311 | 1.27   | 1    | 2     | 40      | 2    | U      | R.TDEVVQREEEAIQLDGLNASQIR.E      |

Figure S2. Mascot report of all matched peptides of GRP94 in three independent experiment

## MSMS spectra of GRP94

### *MATRIX* *SCIENCE* Mascot Search Results

#### Peptide View

MS/MS Fragmentation of **ELISNASDALDK**

Found in **ENPL\_MOUSE**, Endoplasmic OS=Mus musculus GN=Hsp90b1 PE=1 SV=2

Match to Query 14: 1274.567448 from(638.291000,2+) intensity(7925.0684) index(19)

Data file Experiment2\_PRT\_band2 (2).pkl

Click mouse within plot area to zoom in by factor of two about that point

Or,   to  Da

Label all possible matches  Label matches used for scoring

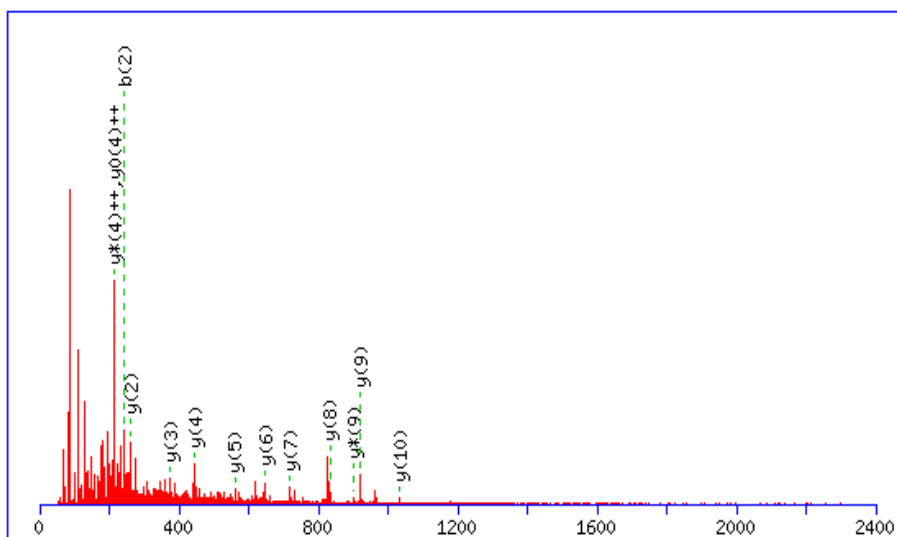

**Figure S3.** Tandem mass spectrum of the Endoplasmic peptide (ELISNASDALDK)

## **{MATRIX}** **{SCIENCE}** Mascot Search Results

### Peptide View

MS/MS Fragmentation of **EEASDYLELDTIK**

Found in **ENPL\_MOUSE**, Endoplasmin OS=Mus musculus GN=Hsp90b1 PE=1 SV=2

Match to Query 60: 1524.731048 from(763.372800,2+) intensity(574.5045) index(116)

Data file Experiment3\_PRT\_band2.pkl

Click mouse within plot area to zoom in by factor of two about that point

Or,   to  Da

Label all possible matches  Label matches used for scoring

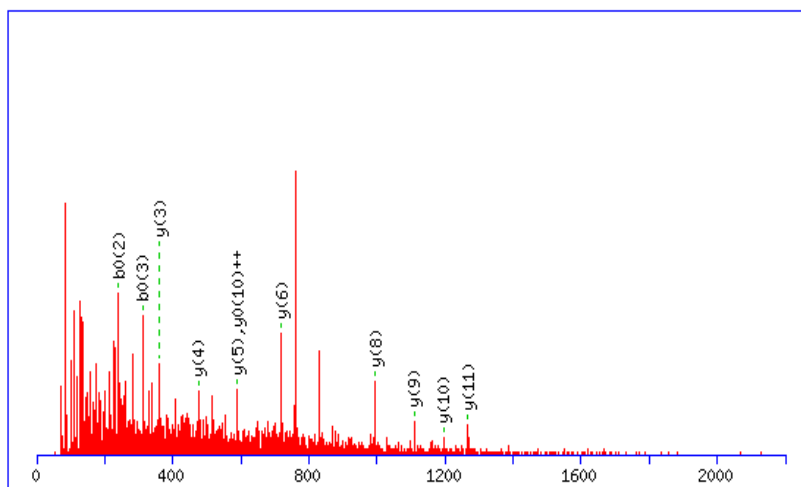

**Figure S4.** Tandem mass spectrum of the Endoplasmin peptide (EEASDYLELDTIK)

## Comparison between canine and murine isoform of GRP94

All the SPR experiments were performed using a canine isoform of GRP94 that was commercially available. To make sure that the homology between the murine and canine isoform was very high, we aligned all sequences using a web software named Clustal W (<http://www.ebi.ac.uk/Tools/msa/clustalw2/>). As reported in **Figure S5**, the sequence alignment reveals that the two proteins have almost the same amino acid sequence. Thus, we have enough confidence that the canine protein is a good model to perform SPR experiments.

| CLUSTAL 2.0.12 multiple sequence alignment |                                                                 |     |
|--------------------------------------------|-----------------------------------------------------------------|-----|
| sp P08113 ENPL_MOUSE                       | MRVLWVLGLCCVLLTFGFSVRADDEVVDGTVVEEDLGKSREGSRTDDEVVQREEEAIQLDG   | 60  |
| sp P41148 ENPL_CANFA                       | MRALWVLGLCCVLLTFGFSVRADDEVVDGTVVEEDLGKSREGSRTDDEVVQREEEAIQLDG   | 60  |
| **.....*                                   |                                                                 |     |
| sp P08113 ENPL_MOUSE                       | LNASQIRELREKSEKFAFQAEVNRMMKLIINSLYKNKEIFLRELISNASDALDKIRLISL    | 120 |
| sp P41148 ENPL_CANFA                       | LNASQIRELREKSEKFAFQAEVNRMMKLIINSLYKNKEIFLRELISNASDALDKIRLISL    | 120 |
| *****                                      |                                                                 |     |
| sp P08113 ENPL_MOUSE                       | TDENALAGNEELTVKIKCDKEKNLLHVTDGTVGMTREELVKNLGTIAKSGTSEFLNKMTE    | 180 |
| sp P41148 ENPL_CANFA                       | TDENALAGNEELTVKIKCDKEKNLLHVTDGTVGMTREELVKNLGTIAKSGTSEFLNKMTE    | 180 |
| *****                                      |                                                                 |     |
| sp P08113 ENPL_MOUSE                       | AQEDGQSTSELIGQFGVGFYS AFLVADKVVITSKHNNDTQHIWESDSNEFSVIADPRGNT   | 240 |
| sp P41148 ENPL_CANFA                       | AQEDGQSTSELIGQFGVGFYS AFLVADKVVITSKHNNDTQHIWESDSNEFSVIADPRGNT   | 240 |
| *****                                      |                                                                 |     |
| sp P08113 ENPL_MOUSE                       | LGRGTTITLVLKEEASDYLELDTIKNLVRKYSQFINFPIYVWSSKTETVEEPLDEEAAK     | 300 |
| sp P41148 ENPL_CANFA                       | LGRGTTITLVLKEEASDYLELDTIKNLVRKYSQFINFPIYVWSSKTETVEEPMEEEAAK     | 300 |
| *****                                      |                                                                 |     |
| sp P08113 ENPL_MOUSE                       | EEKESDDEAAVEEEEEKPKTKKVEKTVWDWELMNDIKPIWQRPSEVEDEYKAFYK         | 360 |
| sp P41148 ENPL_CANFA                       | EEKESDDEAAVEEEEEKPKTKKVEKTVWDWELMNDIKPIWQRPSEVEDEYKAFYK         | 360 |
| *****                                      |                                                                 |     |
| sp P08113 ENPL_MOUSE                       | SFSKESDDPMAYIHFTAEGEVTFKSILFVPTSAPRGLFDEYGSKKSQDIKLYVRRVFTID    | 420 |
| sp P41148 ENPL_CANFA                       | SFSKESDDPMAYIHFTAEGEVTFKSILFVPTSAPRGLFDEYGSKKSQDIKLYVRRVFTID    | 420 |
| *****                                      |                                                                 |     |
| sp P08113 ENPL_MOUSE                       | DFHDMMPKYLNFVKGVDSDDLPLNVSRETLQQHKLLKVIKRLVTKLDMIKKIADKEY       | 480 |
| sp P41148 ENPL_CANFA                       | DFHDMMPKYLNFVKGVDSDDLPLNVSRETLQQHKLLKVIKRLVTKLDMIKKIADKEY       | 480 |
| *****                                      |                                                                 |     |
| sp P08113 ENPL_MOUSE                       | NDTFWKEFGNIKLVGIEDHSNRTRLAKLLRFQSSHHSTDITSLDQYVERMKEKQDKIYF     | 540 |
| sp P41148 ENPL_CANFA                       | NDTFWKEFGNIKLVGIEDHSNRTRLAKLLRFQSSHHSTDITSLDQYVERMKEKQDKIYF     | 540 |
| *****                                      |                                                                 |     |
| sp P08113 ENPL_MOUSE                       | MAGSSRKEAESSPFVERLLKKGYEVIYLTEPVDEYCIQALPEFDGKRFQNVAKEGVKFE     | 600 |
| sp P41148 ENPL_CANFA                       | MAGSSRKEAESSPFVERLLKKGYEVIYLTEPVDEYCIQALPEFDGKRFQNVAKEGVKFE     | 600 |
| *****                                      |                                                                 |     |
| sp P08113 ENPL_MOUSE                       | SEKTKESREAEI EKEFEP LLNWMKDKALKDKIEKAVVSQRLTESPCALVASQYWGSGNMER | 660 |
| sp P41148 ENPL_CANFA                       | SEKTKESREAEI EKEFEP LLNWMKDKALKDKIEKAVVSQRLTESPCALVASQYWGSGNMER | 660 |
| *****                                      |                                                                 |     |
| sp P08113 ENPL_MOUSE                       | IMKAQAYQTGKDISTNYASQKKTFEINRHP LIRDLRRIKEDDDKTVM DLAVVLFET      | 720 |
| sp P41148 ENPL_CANFA                       | IMKAQAYQTGKDISTNYASQKKTFEINRHP LIRDLRRIKEDDDKTVM DLAVVLFET      | 720 |
| *****                                      |                                                                 |     |
| sp P08113 ENPL_MOUSE                       | ATLRSGYLLPDTKAYGDRIERMLRSLNIDPEAQVEEPEEPEPTSEDAEDSEQDEGEE       | 780 |
| sp P41148 ENPL_CANFA                       | ATLRSGYLLPDTKAYGDRIERMLRSLNIDPEAQVEEPEEPEETTEDTTEQDDEE          | 780 |
| *****                                      |                                                                 |     |
| sp P08113 ENPL_MOUSE                       | MDAGTEEEETEKESTEKDEL--                                          | 802 |
| sp P41148 ENPL_CANFA                       | EMDAGTDDEEQETVKKSTA EKDEL                                       | 804 |
| . :*: : : :                                |                                                                 |     |

**Fig. S5.** Sequence alignment of murine and canine GRP 94

## Reference List

- [1] J.A. Vizcaíno, R. Côté, F. Reisinger, J.M. Foster, M. Mueller, J. Rameseder, H. Hermjakob, L. Martens, *Proteomics* **2009**, *18*, 4276-4283.
